# Supplementary material for: Visible light active CdS nanorods: one-pot synthesis of aldonitrones
Source: Royal Society of Chemistry journal article supplement (doi:10.1039/c6nj01459c), 2016-01-01
Supplement: c6nj01459c1.pdf [file c6nj01459c1.pdf]

## Supporting Information

### Visible Light Active CdS Nanorods: One-Pot Synthesis of Aldonitrones

Moosa Ramdar<sup>a</sup>, Foad Kazemi<sup>\*a,b</sup>, Babak Kaboudin<sup>a</sup>, Zahra Taran<sup>a</sup> and Adel Partovi<sup>a</sup>

<sup>a</sup>Department of Chemistry, Institute for Advanced Studies in Basic Sciences (IASBS), 49195-1159, Zanzan, Iran

<sup>b</sup>Center for Climate and Global Warming (CCGW), Institute for Advanced Studies in Basic Sciences (IASBS), GavaZang, Zanzan, Iran \*e-mail: kazemi\_f@iasbs.ac.ir

#### Table of contents:

1. General Information
2. Fig. S1. TGA analysis of cadmium sulfide nanorod.
3. Fig. S2. Dependences of photovoltage (V vs Ag/AgCl) on pH value of electrolyte for nanorodCdS.
4. Fig. S3. The UV-Vis diffuses reflectance spectrum of the CdS nanorod catalyst.
5. NMR spectra of nitrone compounds.
  - 5.1. Fig. S4. <sup>1</sup>H NMR Spectrum of (Z)-N,1-diphenylmethanimine oxide in CDCl<sub>3</sub>
  - 5.2. Fig.S5. <sup>13</sup>C NMR Spectrum of (Z)-N,1-diphenylmethanimine oxide in CDCl<sub>3</sub>
  - 5.3. Fig.S6. <sup>1</sup>H NMR Spectrum of (Z)-1-phenyl-N-(p-tolyl)methanimine oxide in CDCl<sub>3</sub>
  - 5.4. Fig.S7. <sup>13</sup>C NMR Spectrum of (Z)-1-phenyl-N-(p-tolyl)methanimine oxide in CDCl<sub>3</sub>
  - 5.5. Fig. S8. <sup>1</sup>H NMR Spectrum of (Z)-1-(p-chlorophenyl)-N-phenylmethanimine oxide in CDCl<sub>3</sub>
  - 5.6. Fig. S9. <sup>13</sup>C NMR Spectrum of (Z)-1-(p-chlorophenyl)-N-phenylmethanimine oxide in CDCl<sub>3</sub>
  - 5.7. Fig.S10. <sup>1</sup>H NMR Spectrum of (Z)-N-m-tolyl-1-(p-tolyl)methanimine oxide in CDCl<sub>3</sub>
  - 5.8. Fig. S11. <sup>13</sup>C NMR Spectrum of (Z)-N-m-tolyl-1-(p-tolyl)methanimine oxide in CDCl<sub>3</sub>
  - 5.9. Fig.S12. <sup>1</sup>H NMR Spectrum of (Z)-1-(p-chlorophenyl)-N-(m-tolyl)methanimine oxide in CDCl<sub>3</sub>
  - 5.10. Fig.S13. <sup>13</sup>C NMR Spectrum of (Z)-1-(p-chlorophenyl)-N-(m-tolyl)methanimine oxide in CDCl<sub>3</sub>
  - 5.11. Fig. S14. <sup>1</sup>H NMR Spectrum of (Z)-1-phenyl-N-(m-tolyl)methanimine oxide in CDCl<sub>3</sub>
  - 5.12. Fig. S15. <sup>13</sup>C NMR Spectrum of (Z)-1-phenyl-N-(m-tolyl)methanimine oxide in CDCl<sub>3</sub>
  - 5.13. Fig.S16. <sup>1</sup>H NMR Spectrum of (Z)-1-(p-(methylthio)phenyl)-N-phenylmethanimine oxide in CDCl<sub>3</sub>
  - 5.14. Fig. S17. <sup>13</sup>C NMR Spectrum of (Z)-1-(p-(methylthio)phenyl)-N-phenylmethanimine oxide in CDCl<sub>3</sub>
  - 5.15. Fig. S18. <sup>1</sup>H NMR Spectrum of (Z)-N,1-di-m-tolylmethanimine oxide in CDCl<sub>3</sub>
  - 5.16. Fig. S19. <sup>13</sup>C NMR Spectrum of (Z)-N,1-di-m-tolylmethanimine oxide in CDCl<sub>3</sub>
6. Spectral data
7. Table S1. CHNS analysis of nitrone compounds.
8. Table S2. CHNS analysis of the CdS catalysts.

## 1. General Information

Nitro compounds, poly ethylene glycol-400 (PEG-400), cadmium chloride and oxalic acid were purchased from Merck Co. Ammonium formates ( $\text{HCO}_2\text{NH}_4$ ) was supplied by Fluka Co. All chemicals were used as received without further purification. Deionized water was used in all experiments.  $^1\text{H}$  and  $^{13}\text{C}$  nuclear magnetic resonance (NMR) spectra were recorded on Bruker 400 MHz-Avance III. CHNS analysis was recorded with ElementarVario EL III. UV-Visible diffusive reflectance spectra (DRS) were measured on Varian Cary 100 UV-Vis. TEM images was obtained with Philips CM120, VEGA\TESCAN-XMU. Thermogravimetric analysis was conducted from room temperature to 700 °C in a nitrogen flow using a NETZSCH STA 409 PC/PG instrument. Nitrogen sorption analysis (Belsorp, BELMAX, Japan) was used for further analysis of the catalyst.

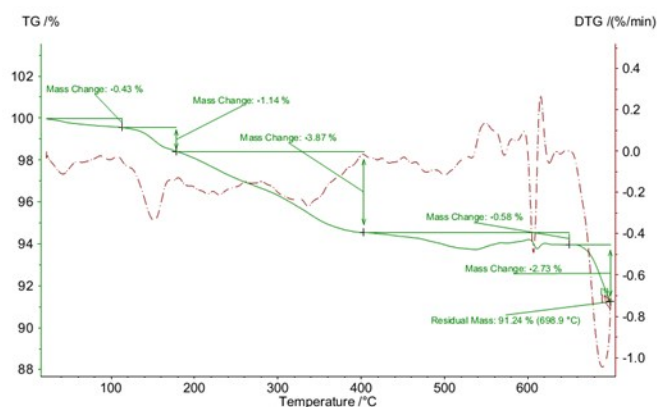

Fig. S1 TGA analysis of the CdS nanorod.

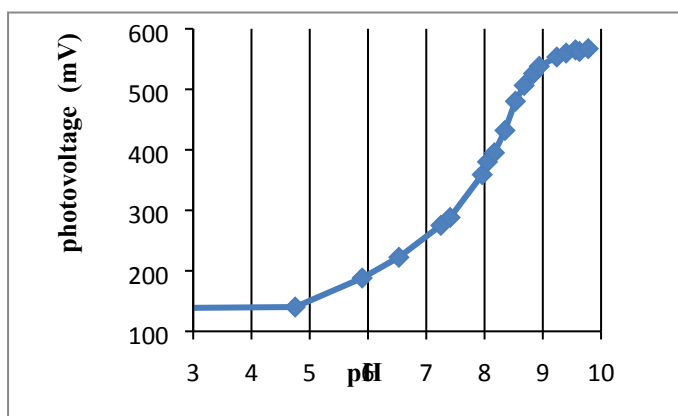

Fig. S2 Dependences of photovoltage (V vs Ag/AgCl) on pH value of electrolyte for nanorod CdS

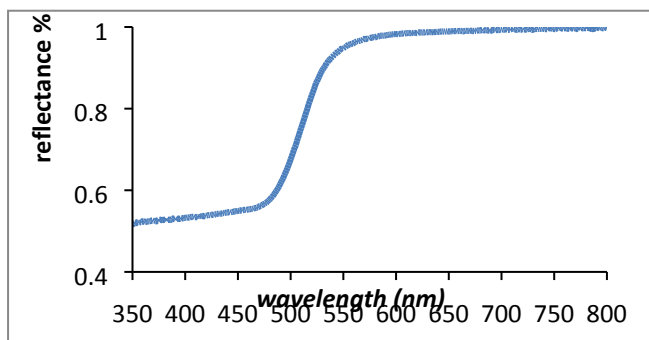

Fig. S3 The UV-Vis diffuses reflectance spectrum of the CdS nanorod catalyst.

## 5. NMR spectra of nitron compounds

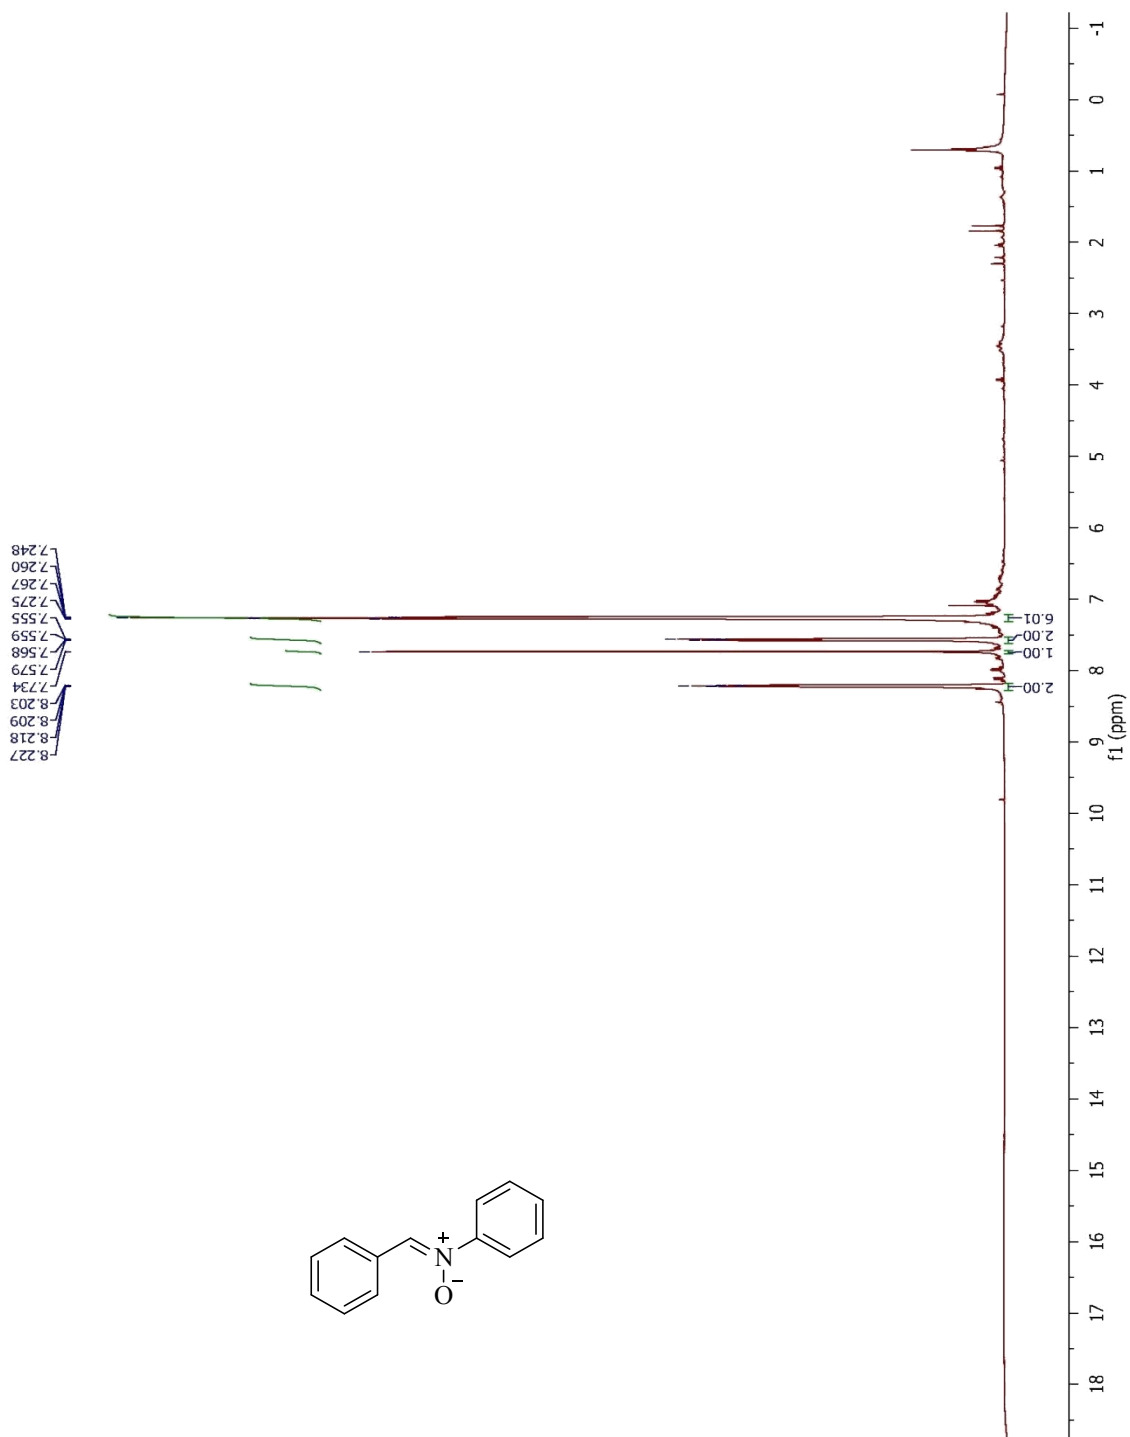

Fig.S  $^1\text{H}$  NMR Spectrum of (Z)-N,1-diphenylmethanimine oxide in  $\text{CDCl}_3$ .

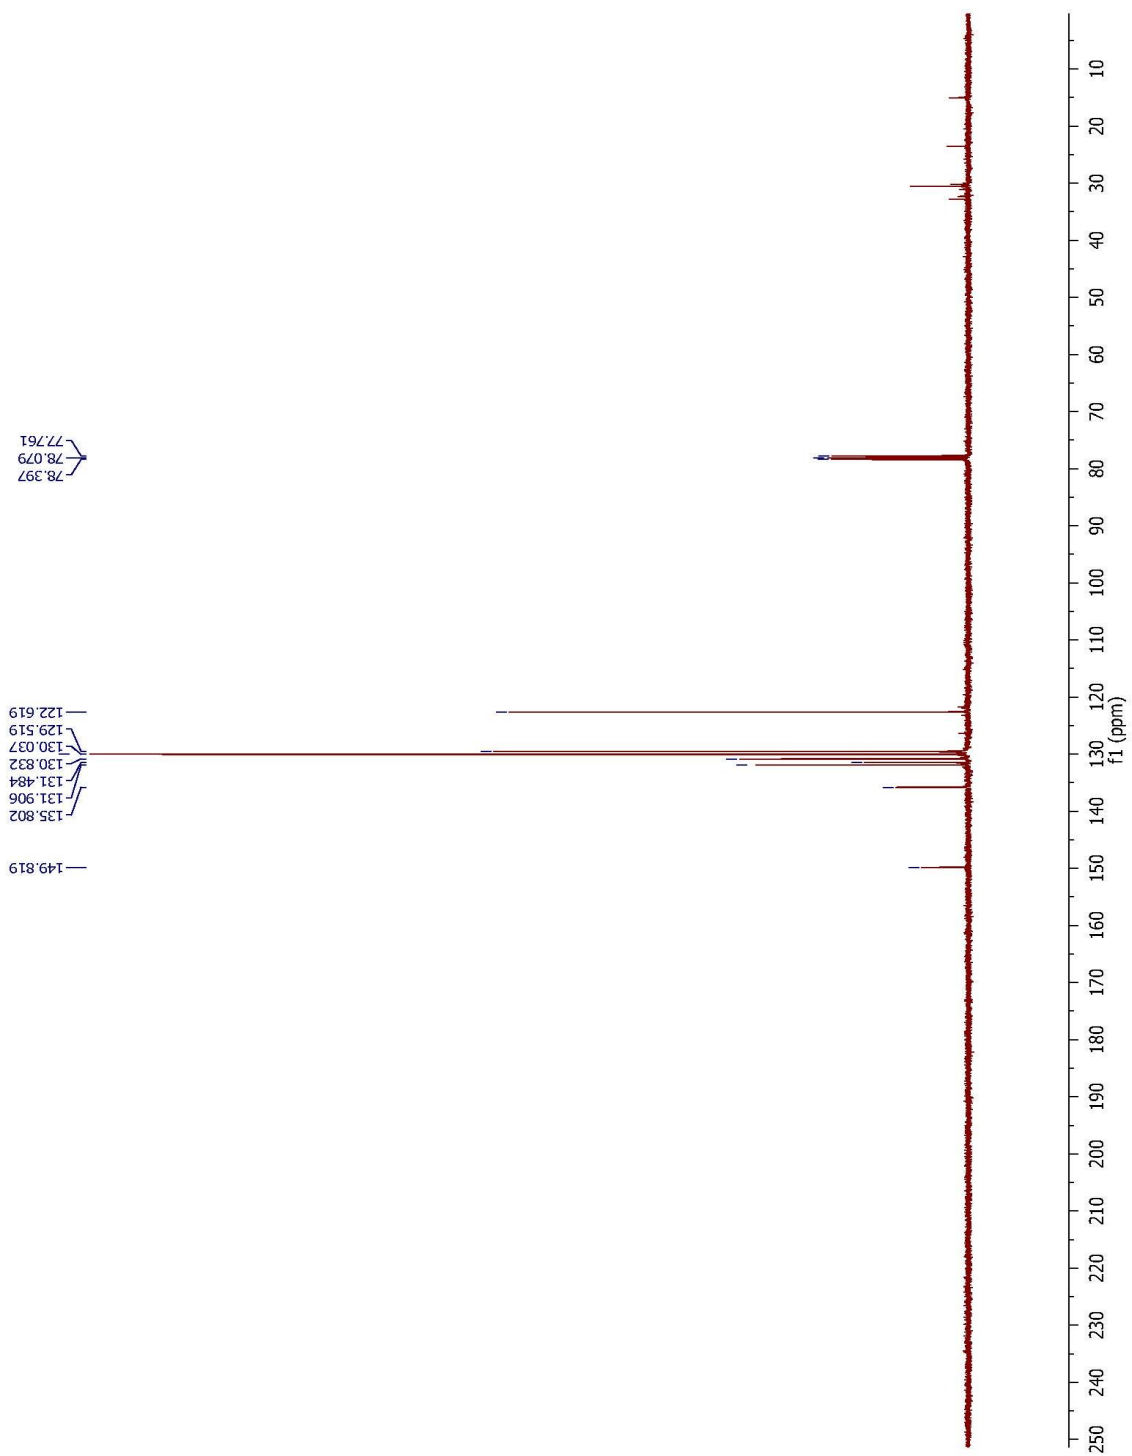

**Fig.S5**  $^{13}\text{C}$  NMR Spectrum of (Z)-N,1-diphenylmethanimine oxide in  $\text{CDCl}_3$ .

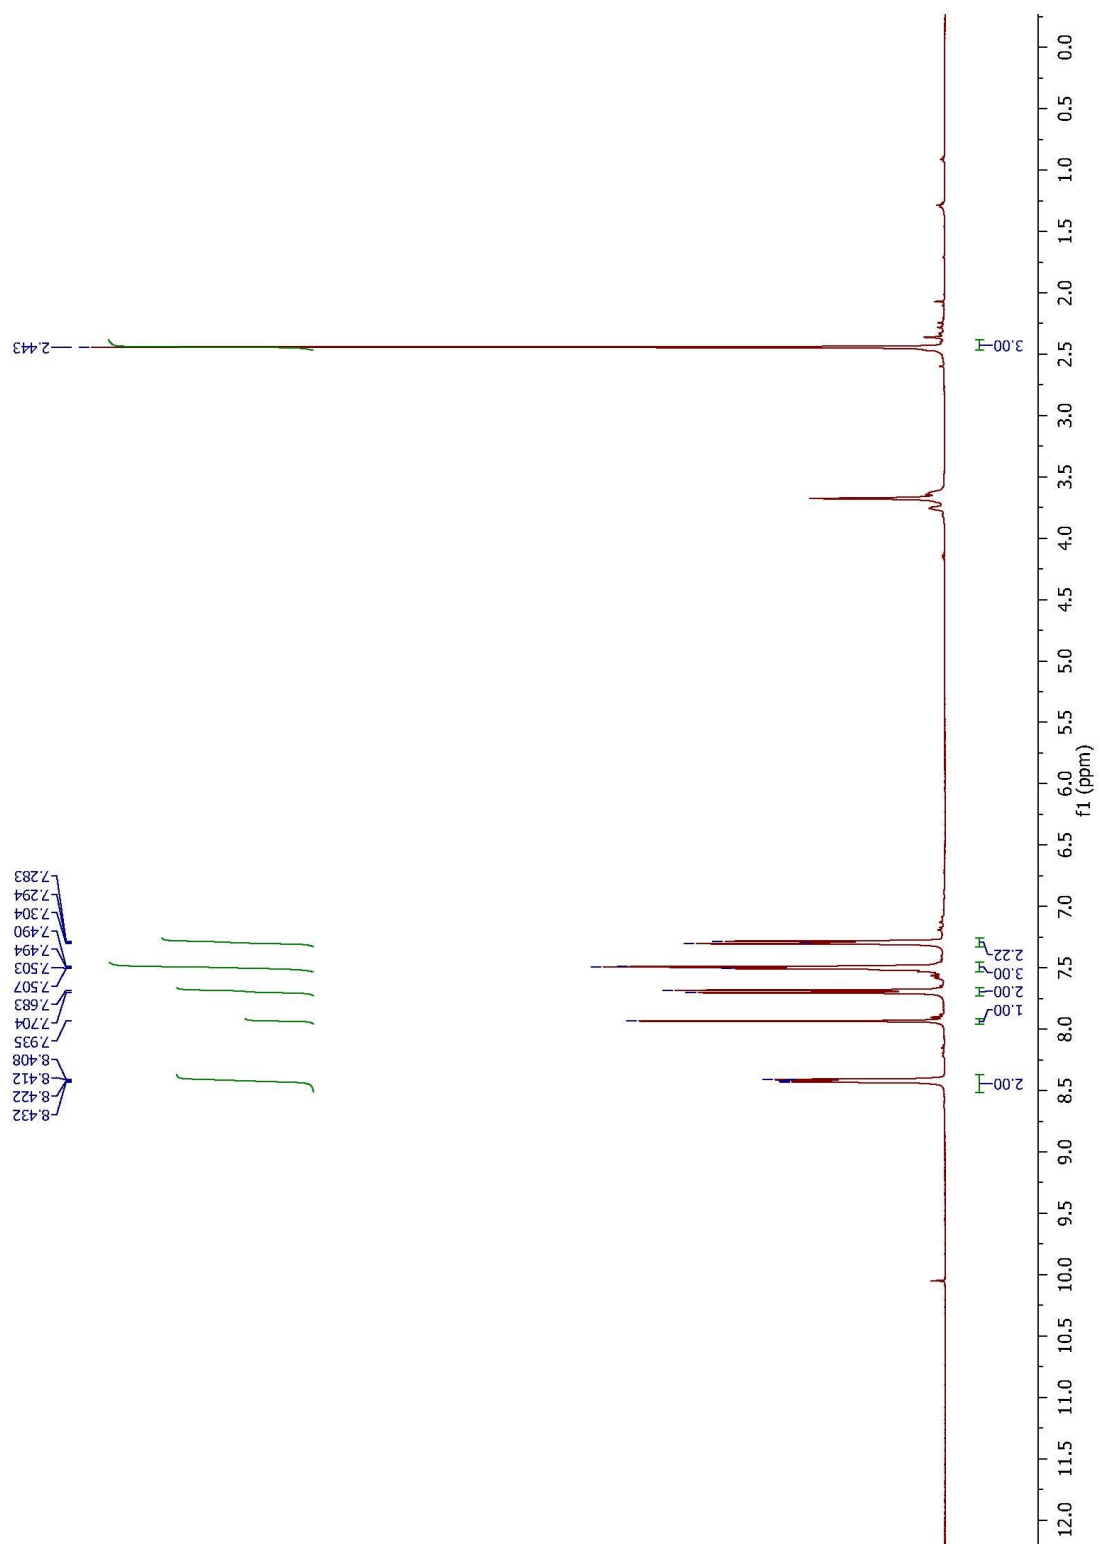

**Fig.S6**  $^1\text{H}$  NMR Spectrum of (Z)-1-phenyl-N-(p-tolyl)methanimine oxide in  $\text{CDCl}_3$ .

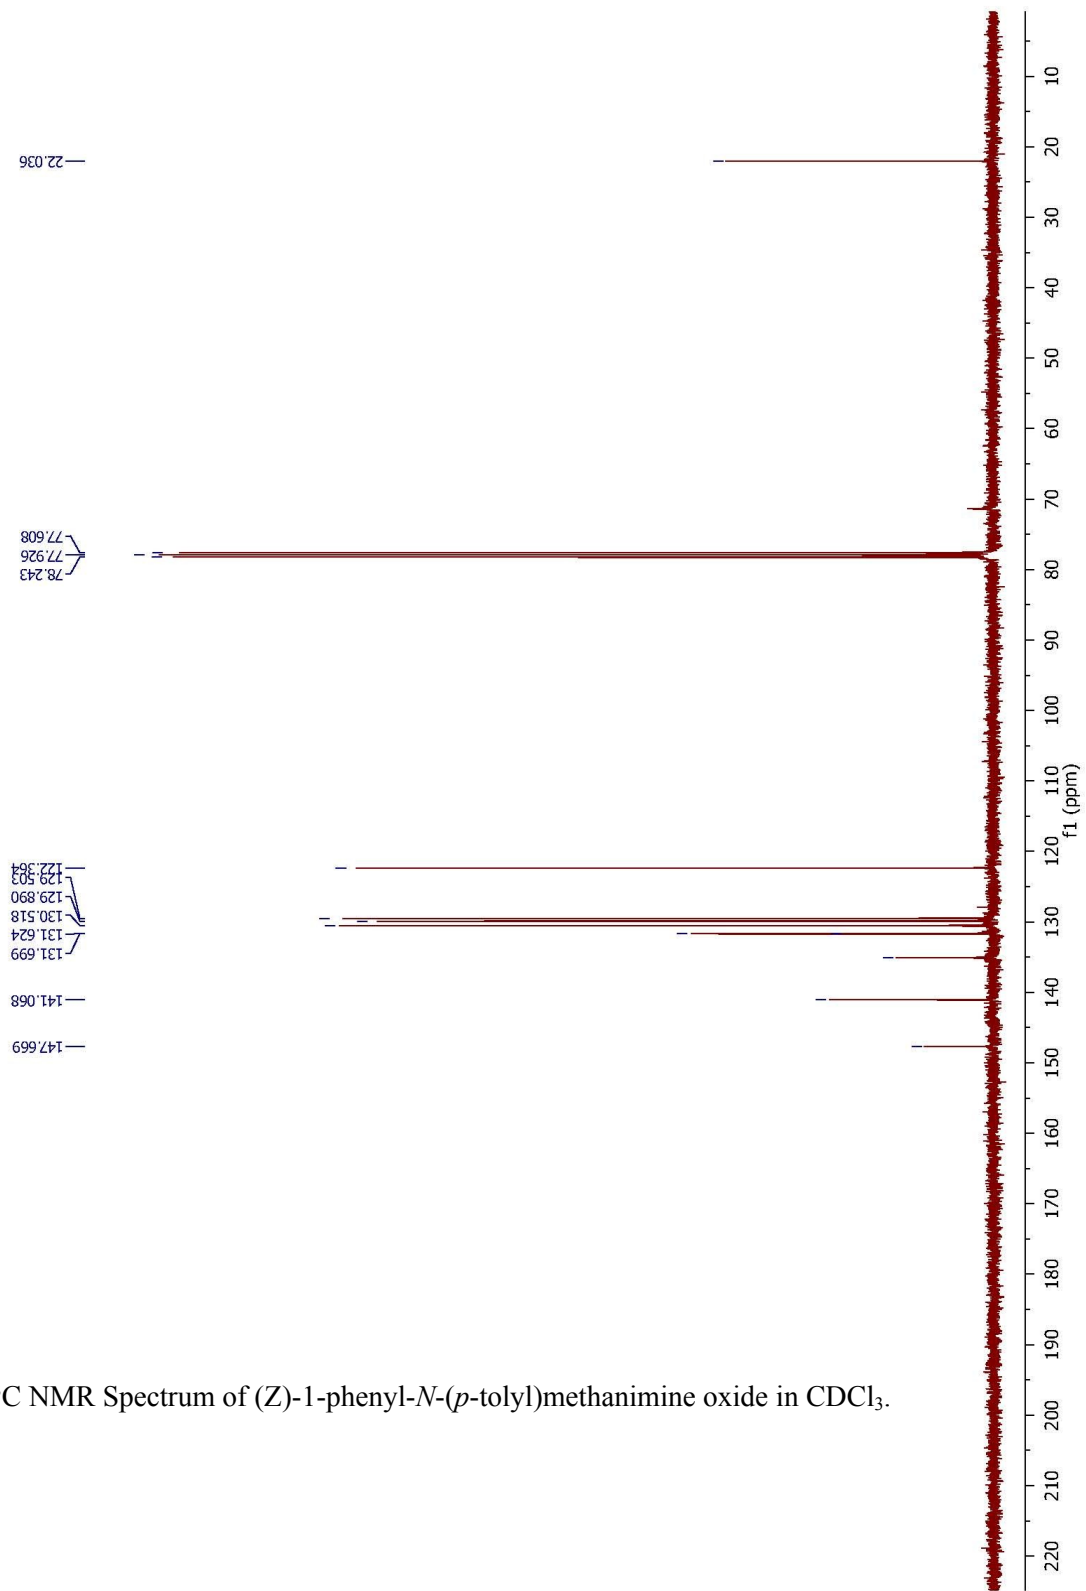

**Fig.S7**  $^{13}\text{C}$  NMR Spectrum of (Z)-1-phenyl-N-(p-tolyl)methanimine oxide in  $\text{CDCl}_3$ .

Fig

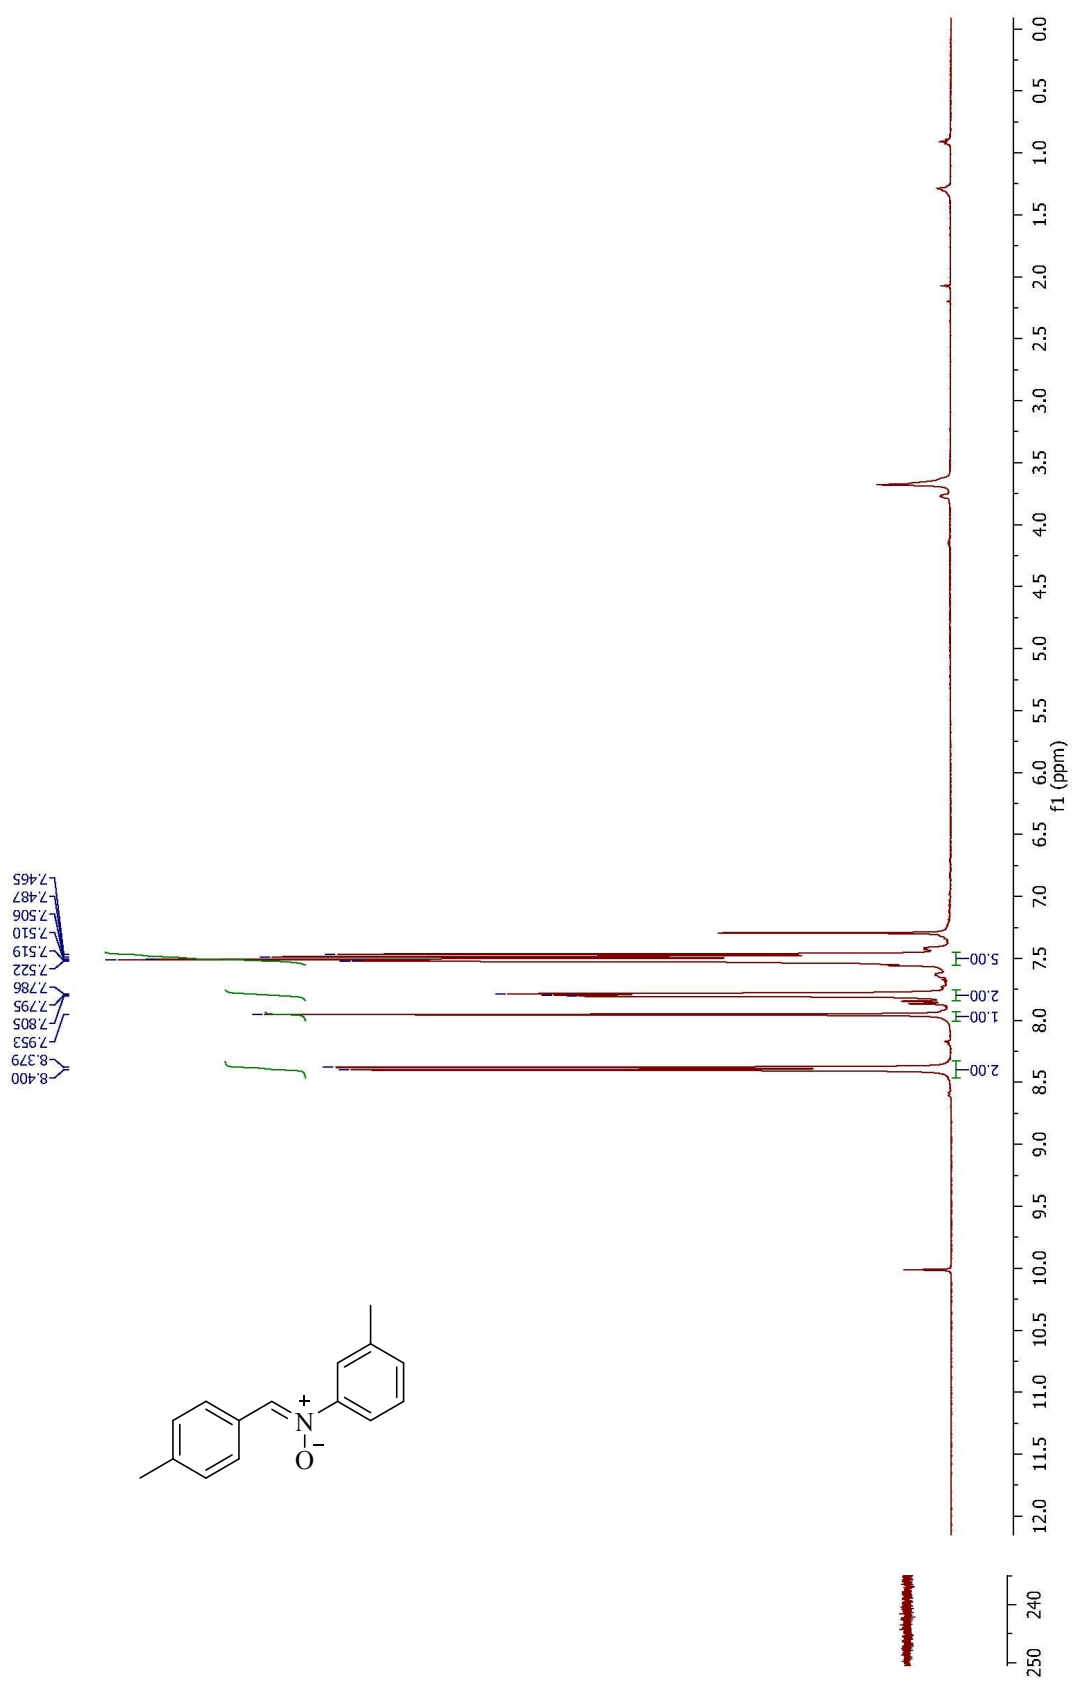

Fig.S9  $^{13}\text{C}$  NMR Spectrum of (Z)-1-(p-chlorophenyl)-N-phenylmethanimine oxide in  $\text{CDCl}_3$ .

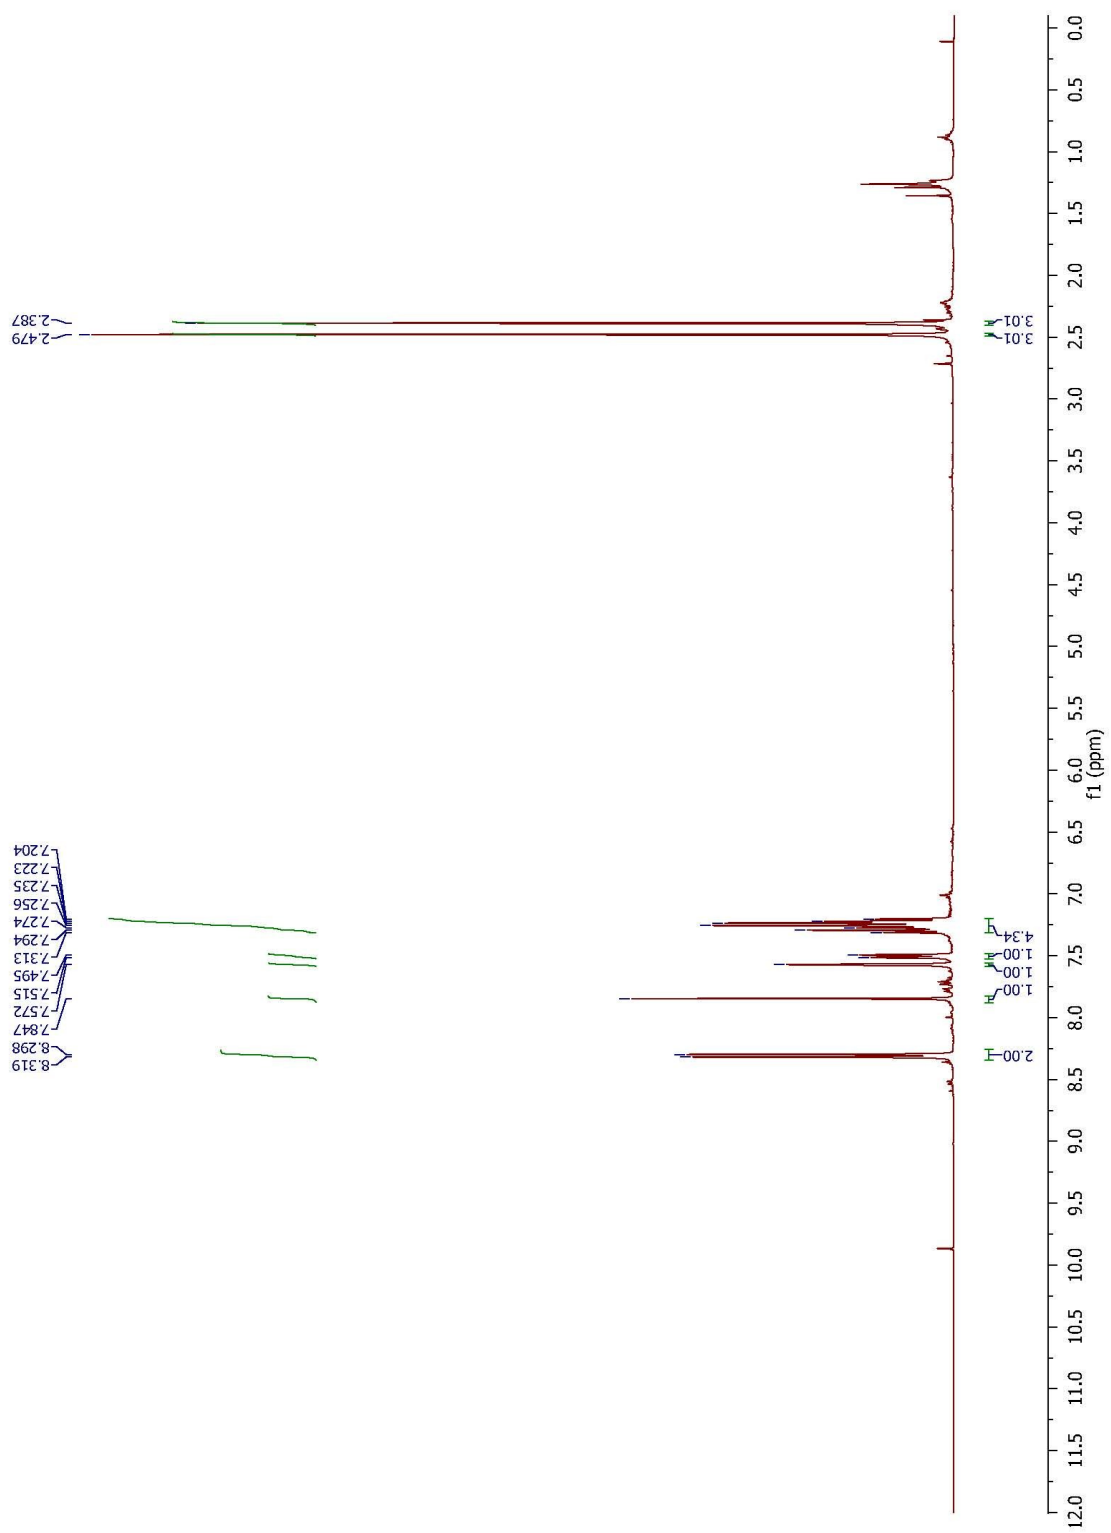

**Fig.S10** <sup>1</sup>H NMR Spectrum of (Z)-N-m-tolyl-1-(p-tolyl)methanimine oxide in CDCl<sub>3</sub>.



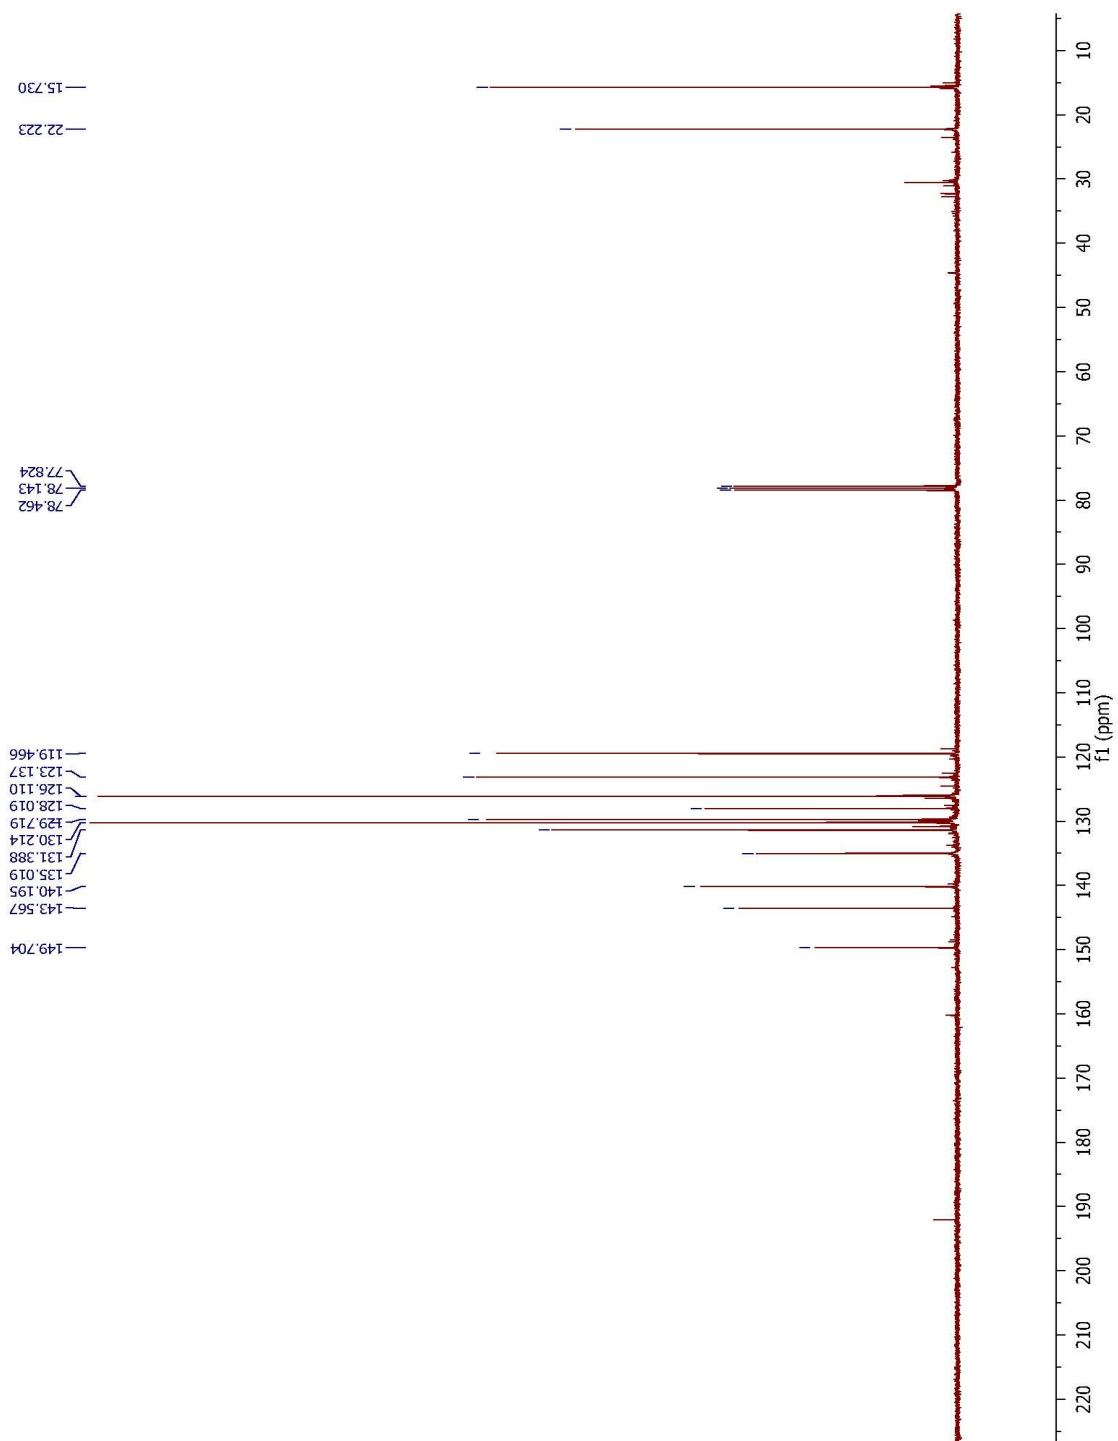

**Fig.S11** <sup>13</sup>C NMR Spectrum of (Z)-N-m-tolyl-1-(p-tolyl)methanimine oxide in CDCl<sub>3</sub>.

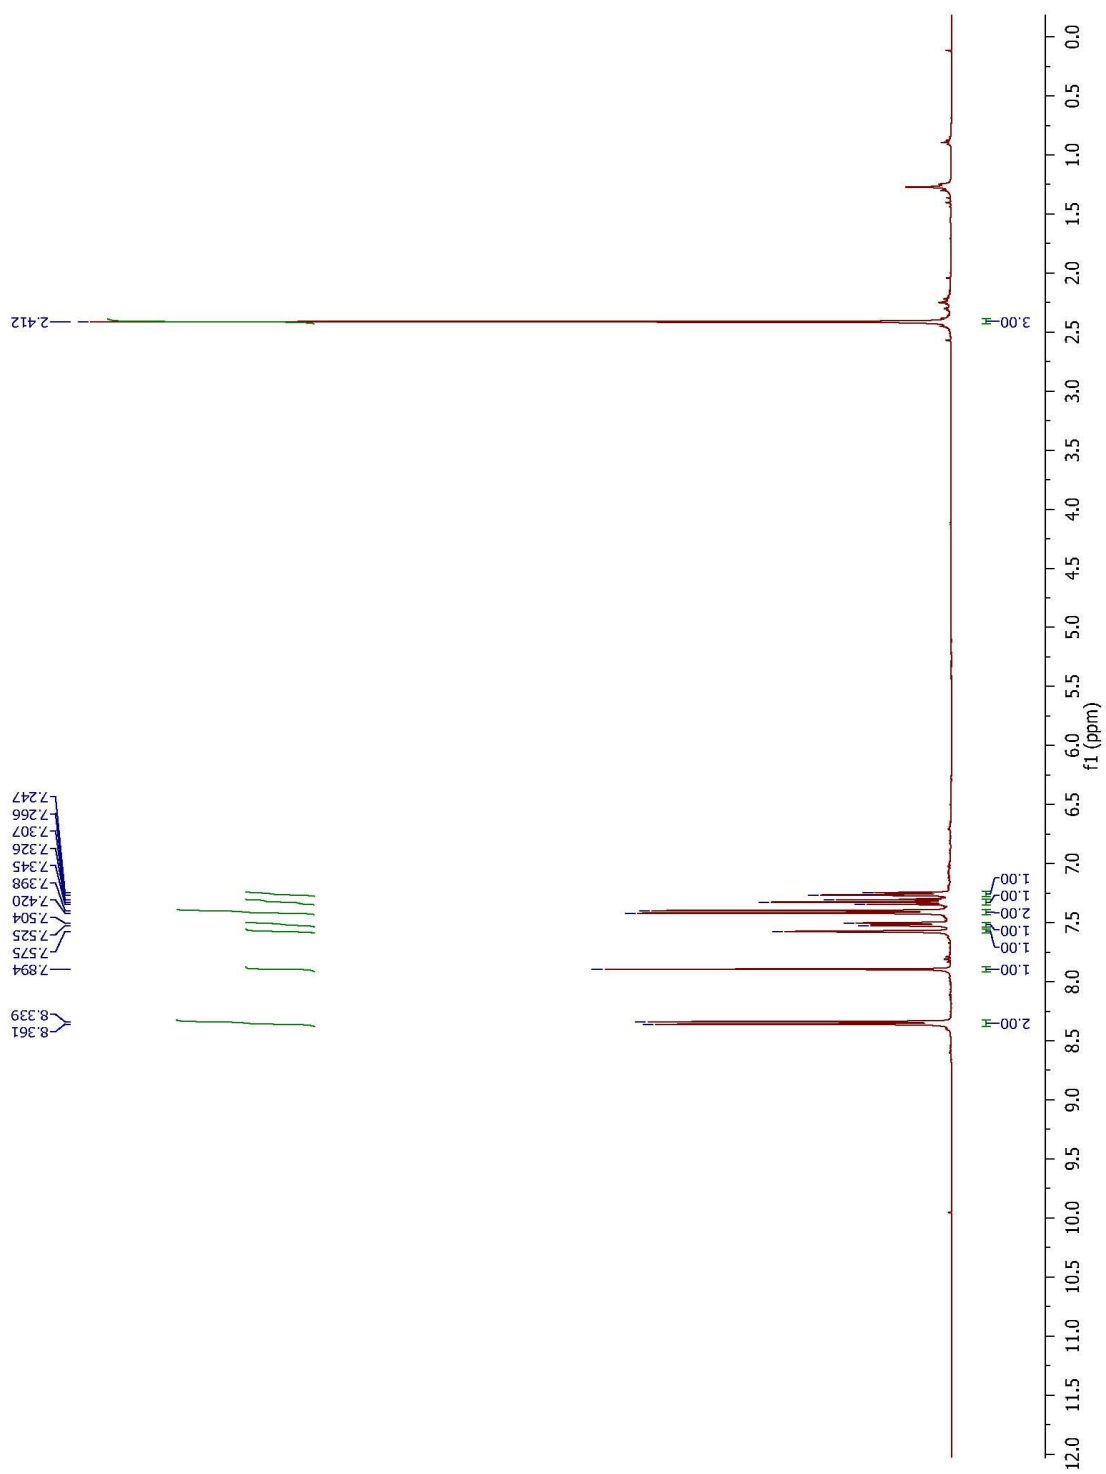

**Fig.S12**  $^1\text{H}$  NMR Spectrum of (Z)-1-(p-chlorophenyl)-N-(m-tolyl)methanimine oxide in  $\text{CDCl}_3$ .

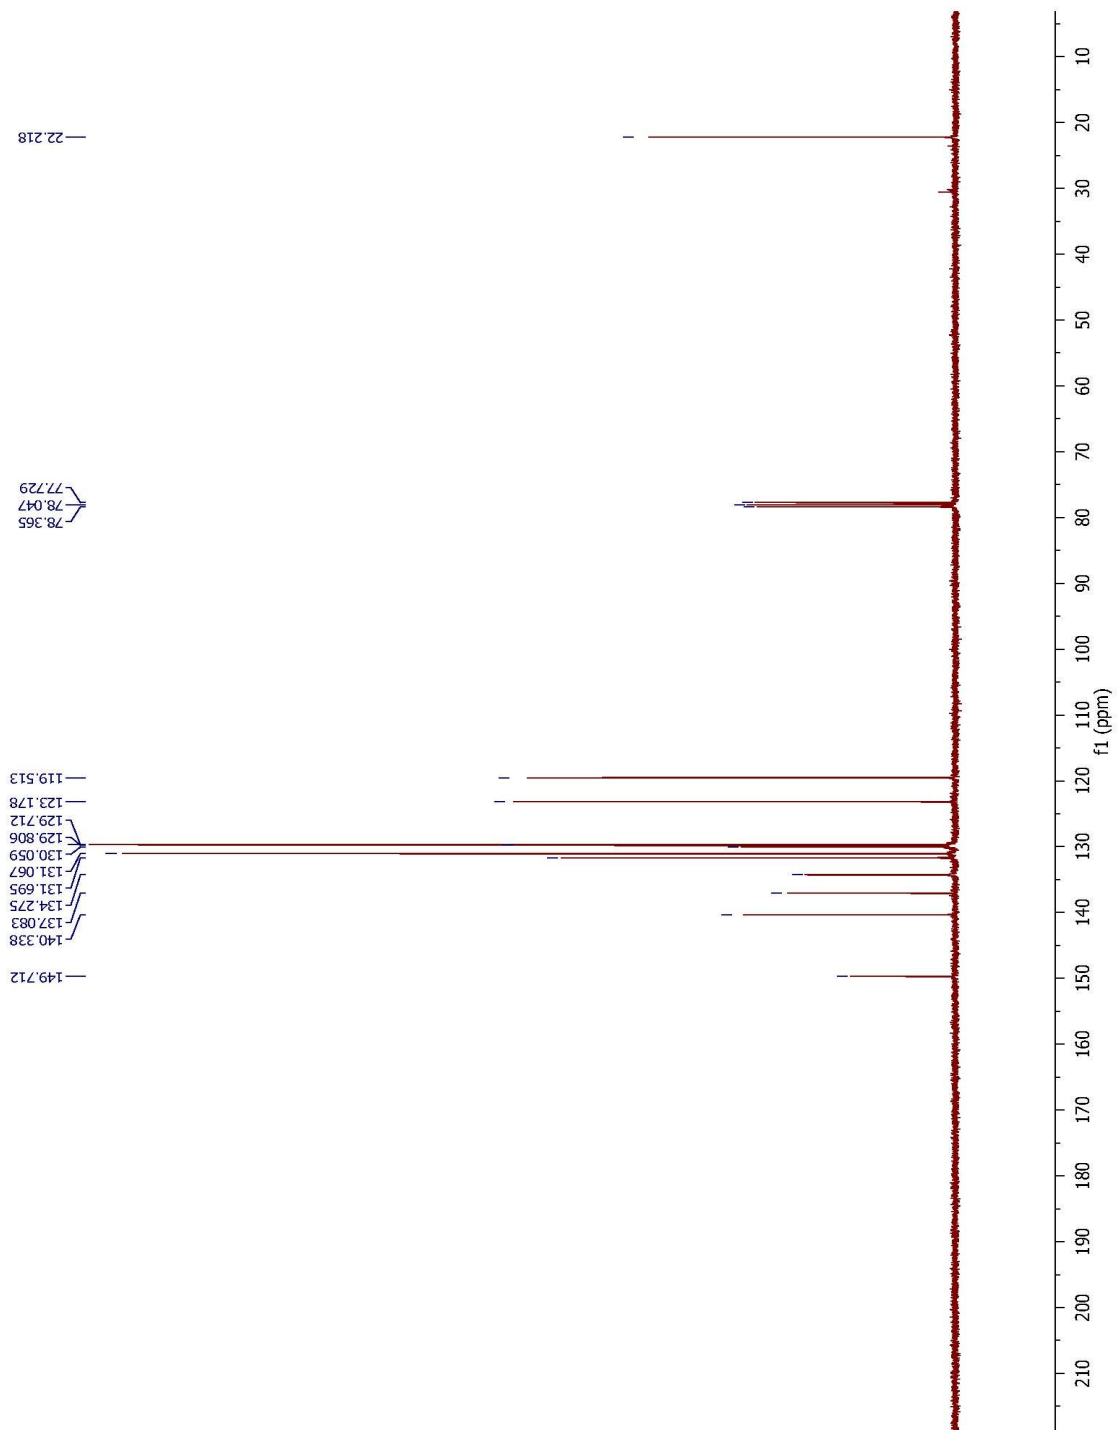

**Fig.S13**  $^{13}\text{C}$  NMR Spectrum of (Z)-1-(p-chlorophenyl)-N-(m-tolyl)methanimine oxide in  $\text{CDCl}_3$ .

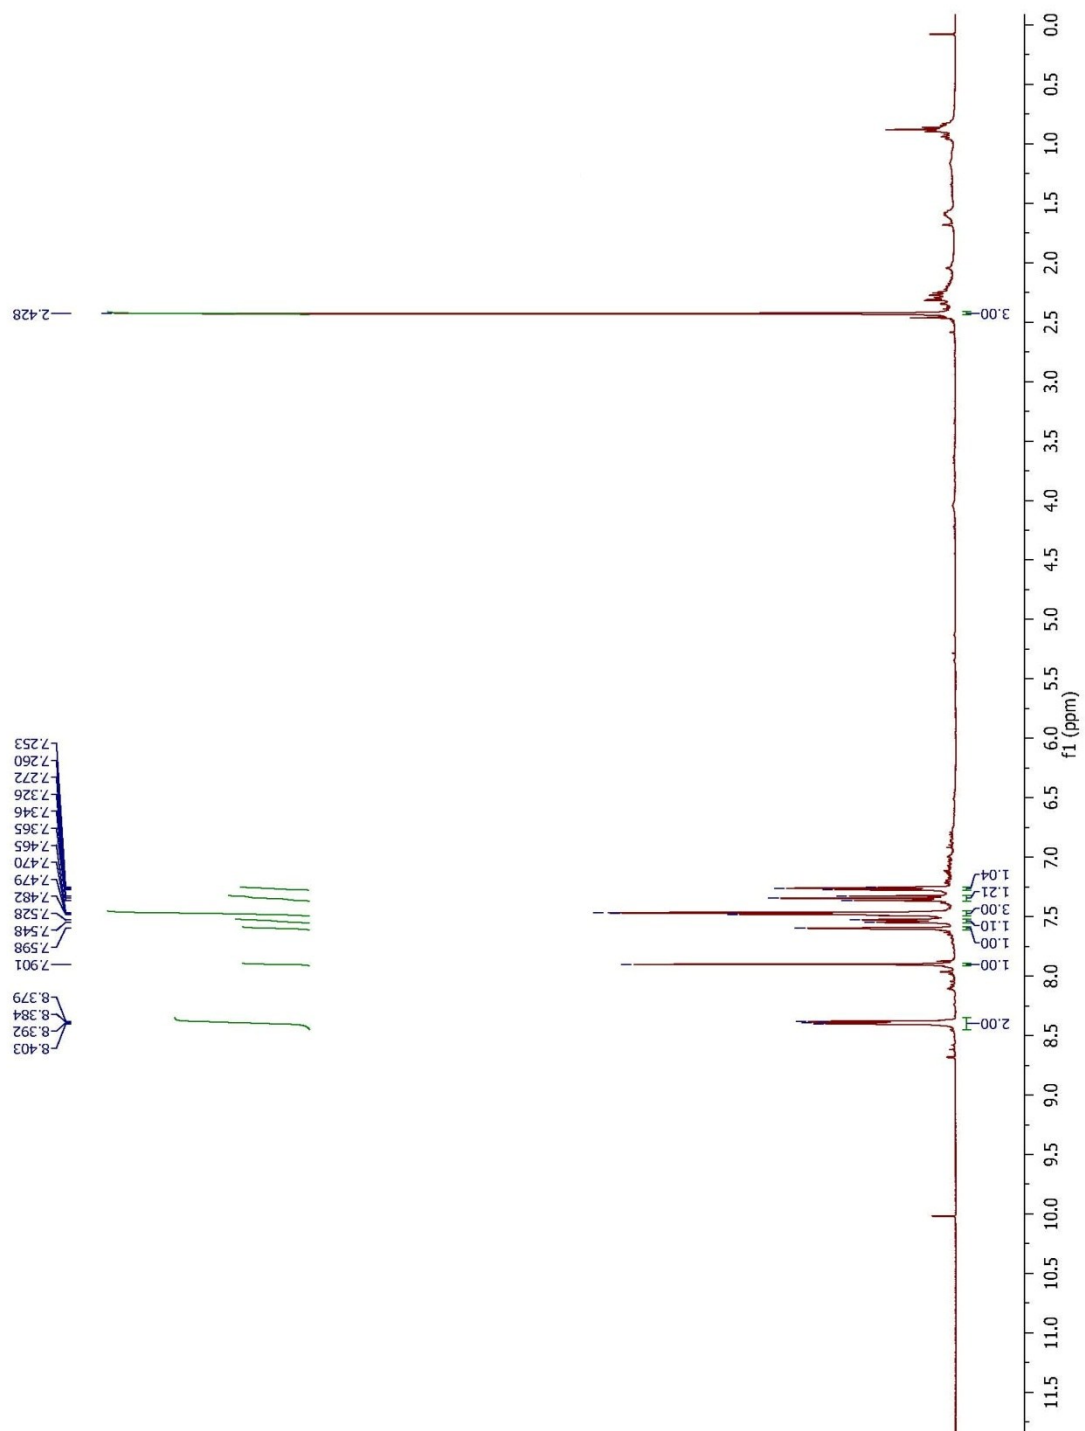

**Fig.S14**  $^1\text{H}$  NMR Spectrum of (Z)-1-phenyl-N-(m-tolyl)methanimine oxide in  $\text{CDCl}_3$ .

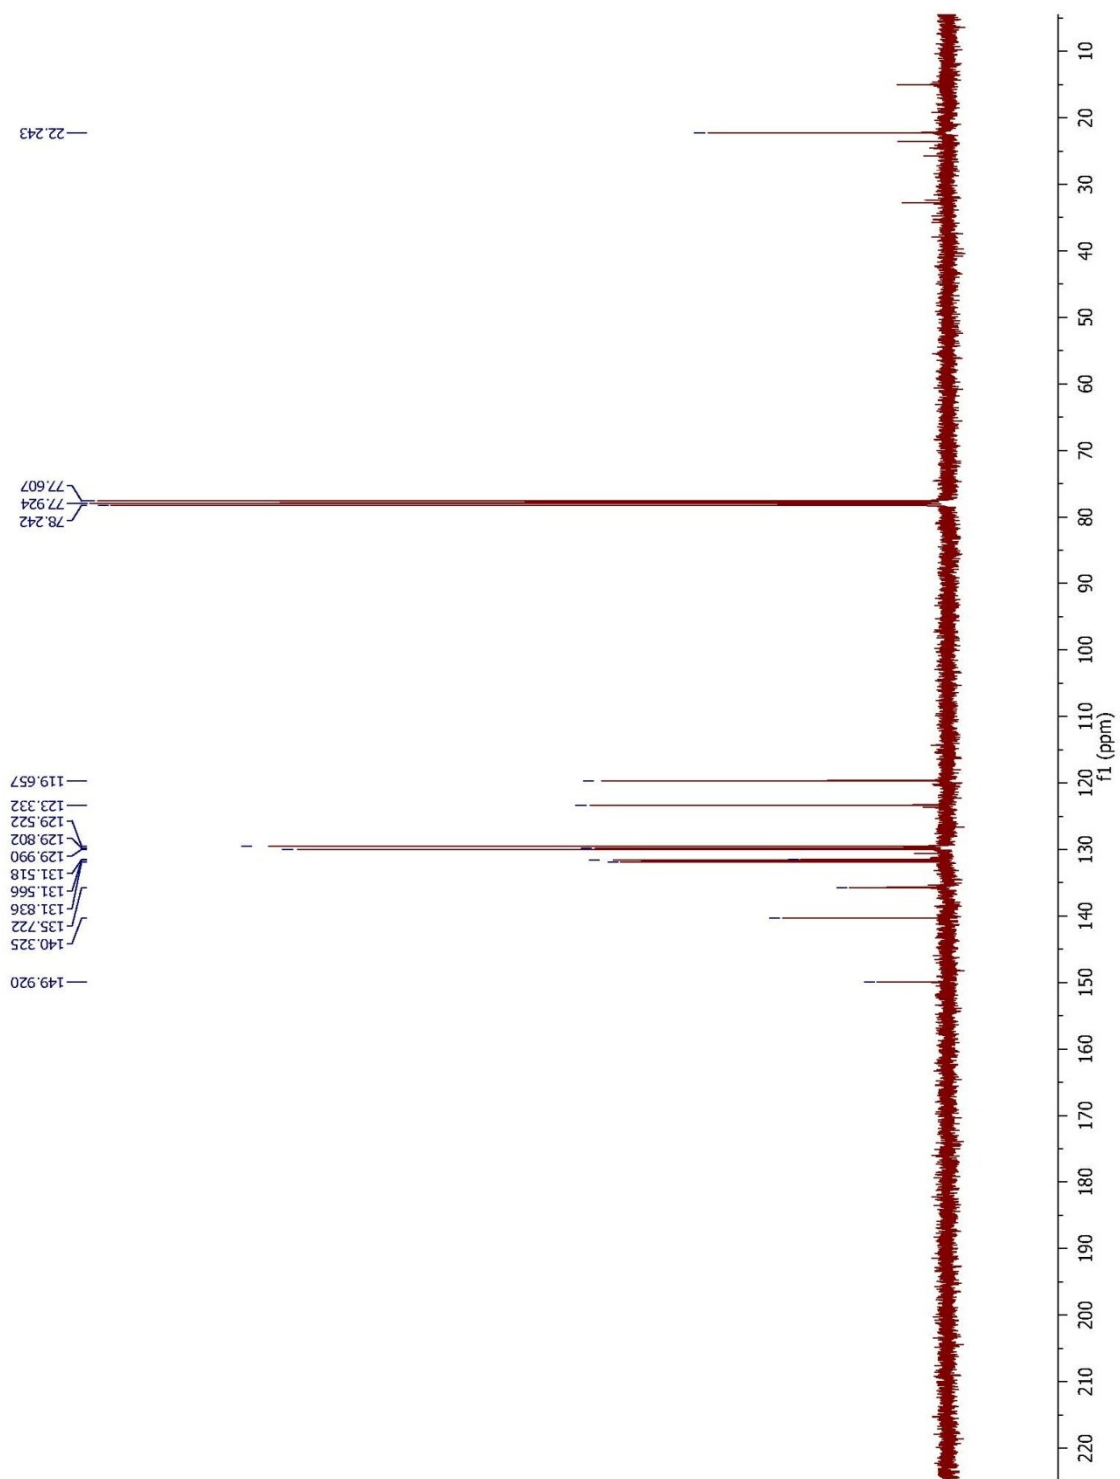

**Fig.S15** <sup>13</sup>C NMR Spectrum of (Z)-1-phenyl-N-(*m*-tolyl)methanimine oxide in CDCl<sub>3</sub>.

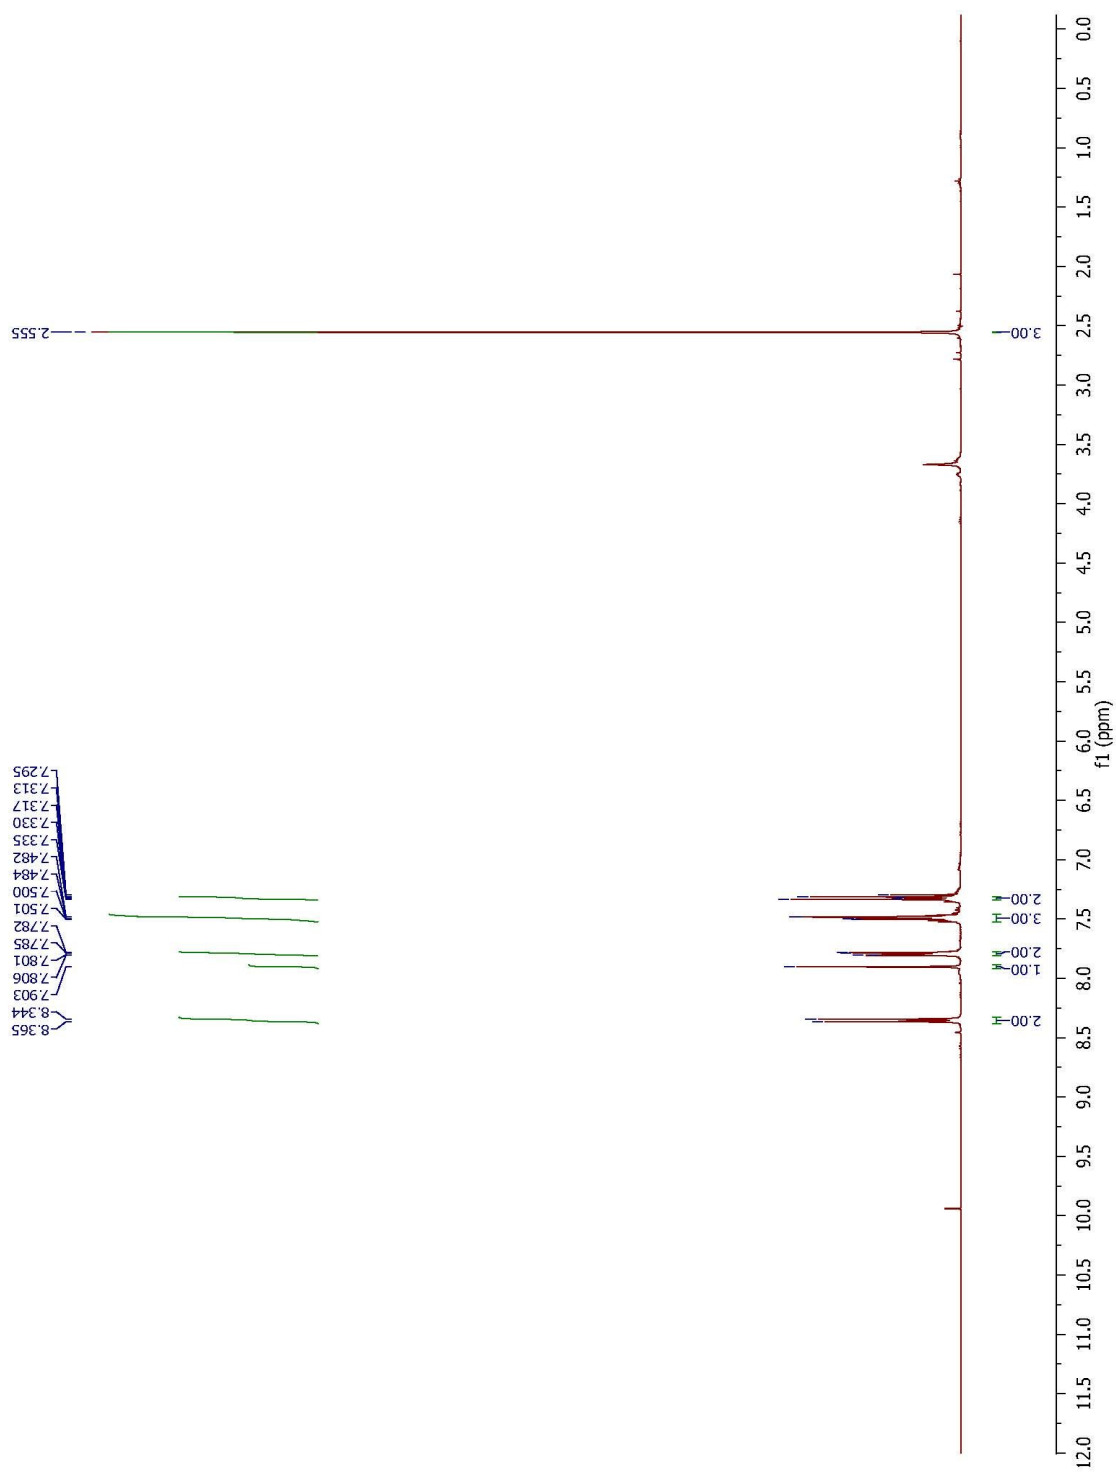

**Fig.S16**  $^1\text{H}$  NMR Spectrum of (Z)-1-(*p*-(methylthio)phenyl)-*N*-phenylmethanimine oxide in  $\text{CDCl}_3$ .

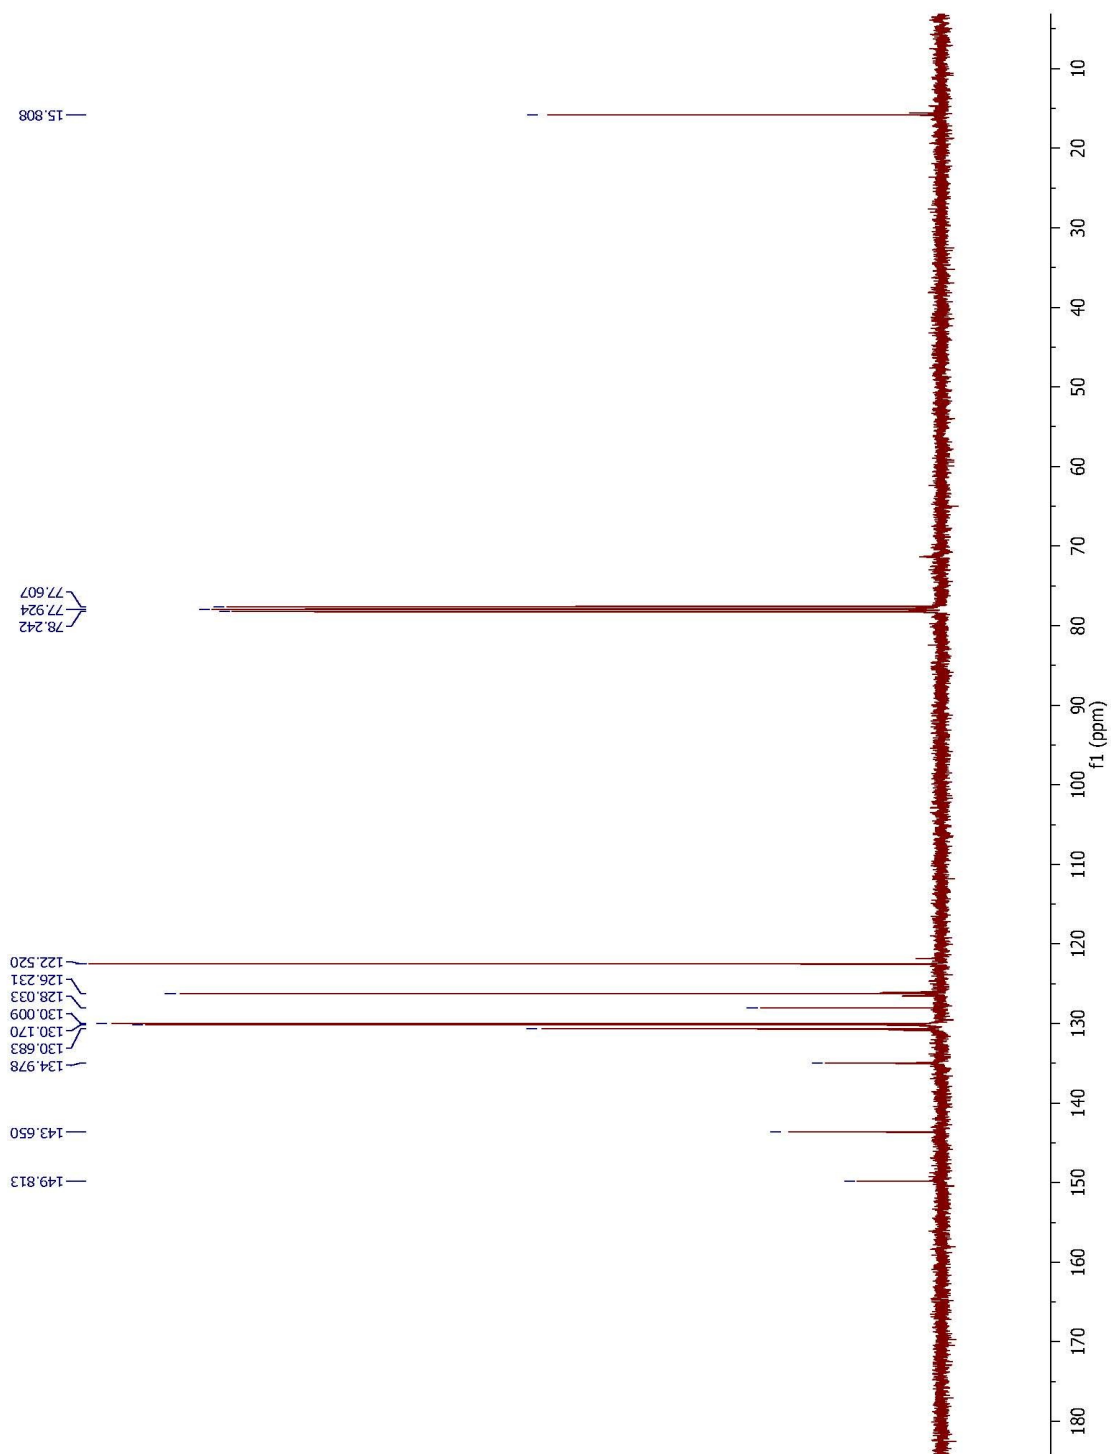

**Fig.S17**  $^{13}\text{C}$  NMR Spectrum of (Z)-1-(p-(methylthio)phenyl)-N-phenylmethanimine oxide in  $\text{CDCl}_3$ .

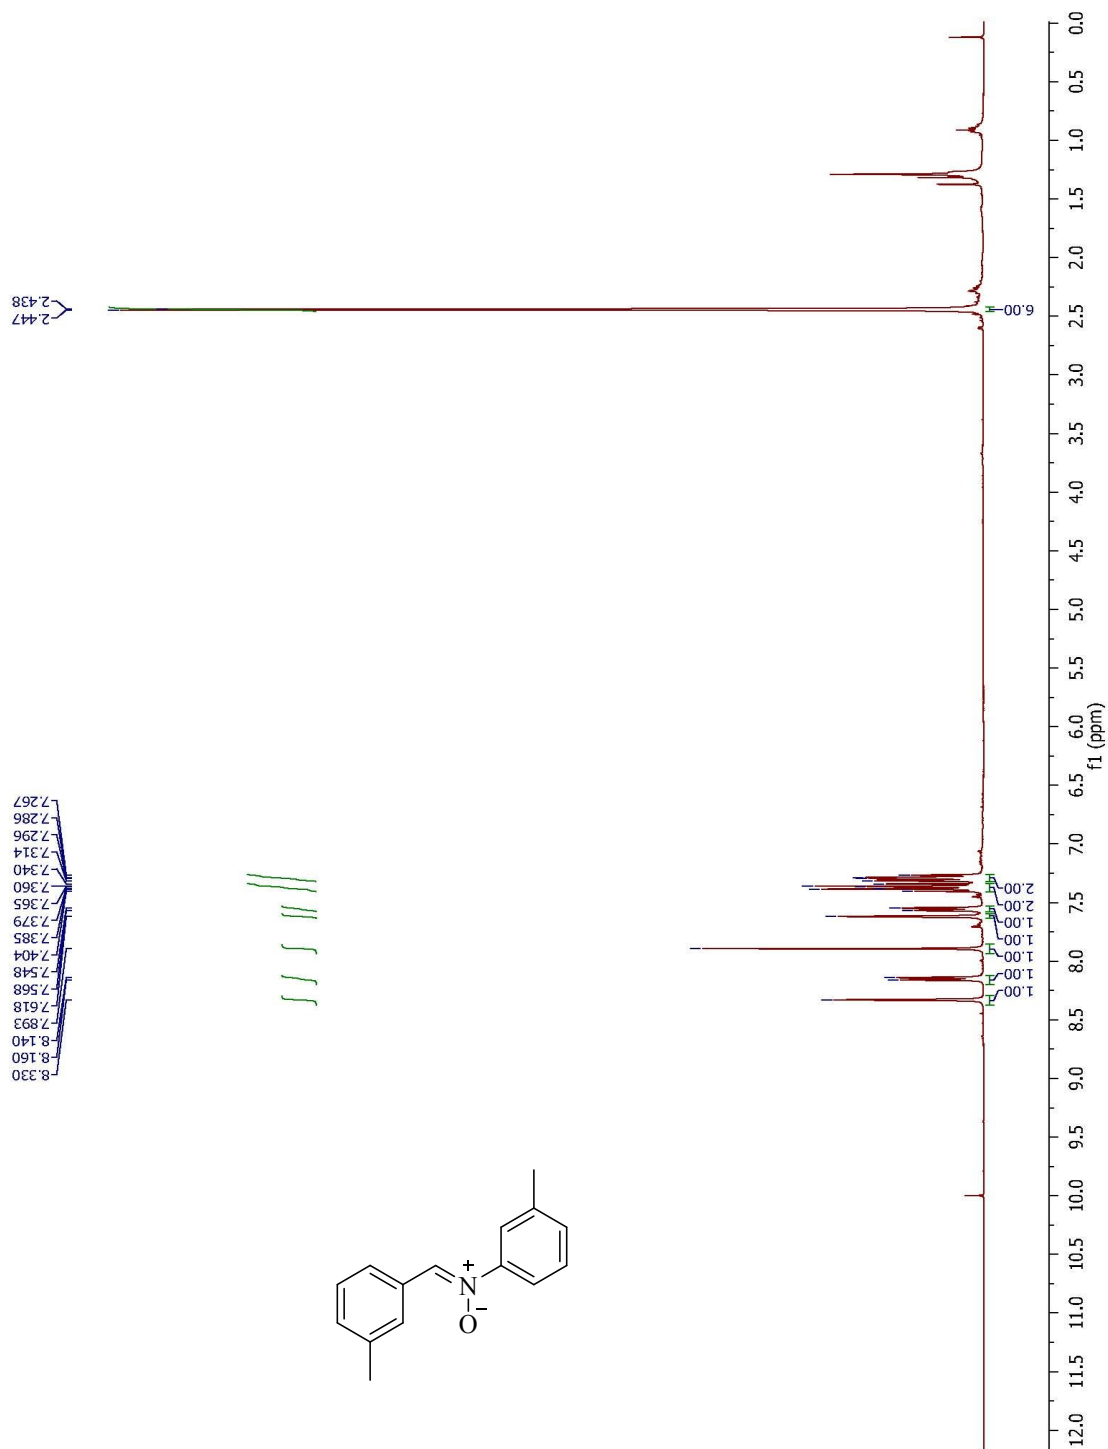

**Fig. S18** <sup>1</sup>H NMR Spectrum of (Z)-N,1-di-*m*-tolylmethanimine oxide in CDCl<sub>3</sub>.



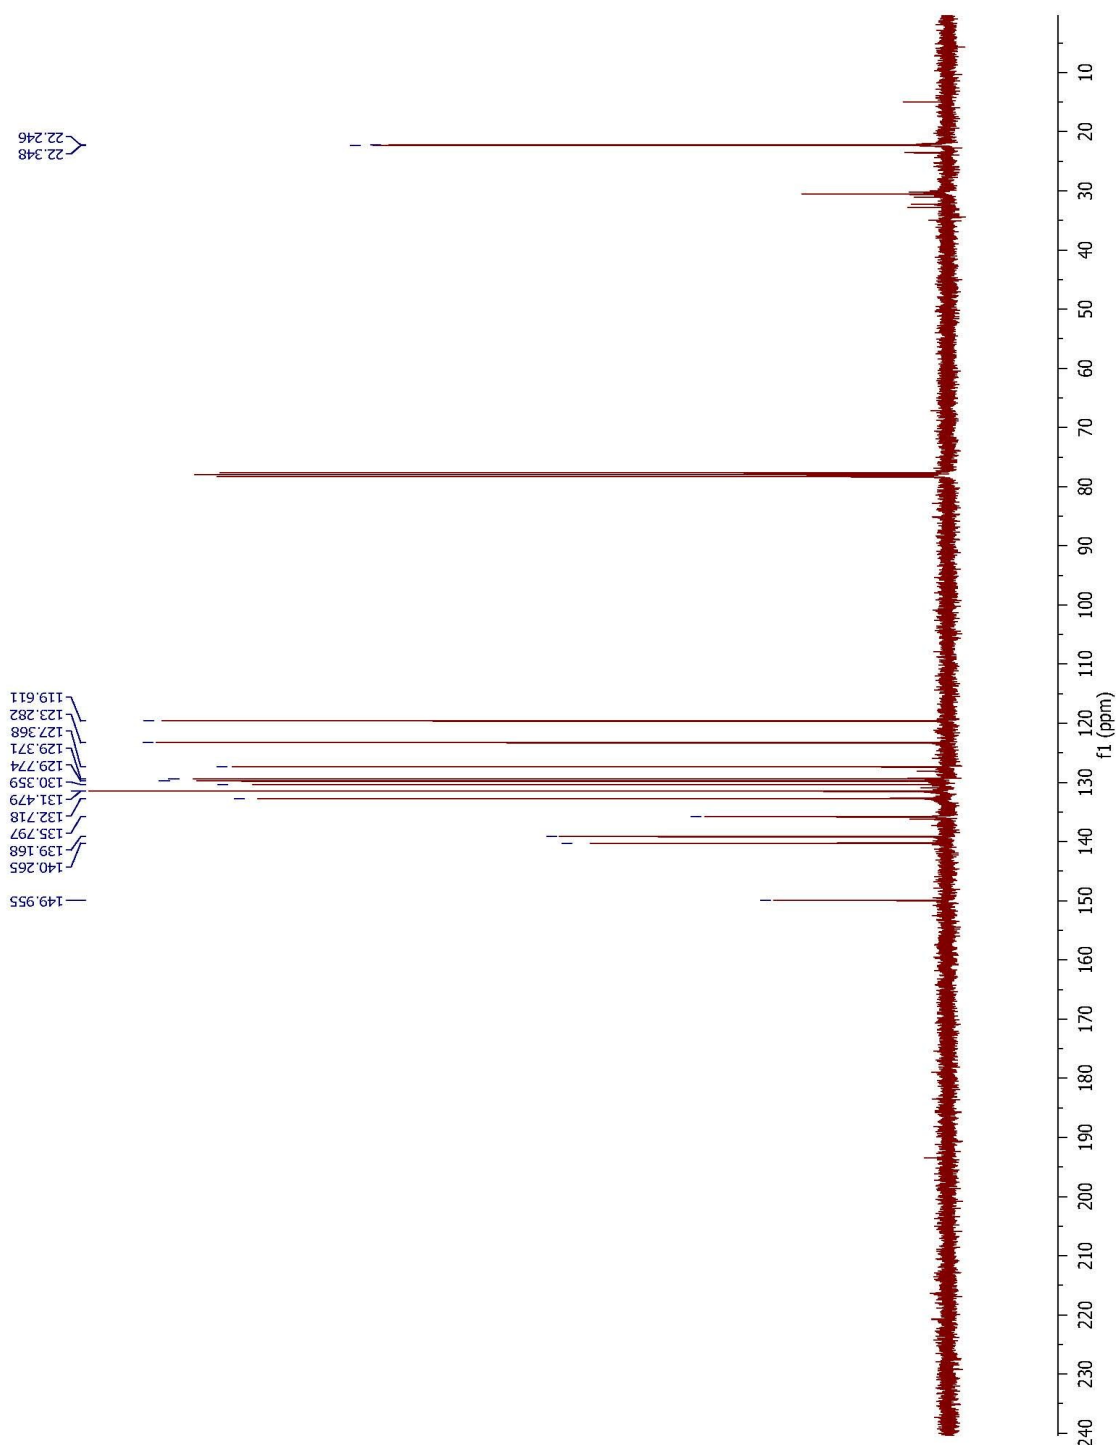

6

(Z)-N,1-di-*m*-tolylmethanimine oxide. white crystal, mp: 115-115 °C. <sup>1</sup>H NMR (400 MHz, CDCl<sub>3</sub>) δ 8.21 (dd, *J* = 6.6, 3.1 Hz, 1H), 7.73 (s, 1H), 7.57 (dd, *J* = 6.5, 3.1 Hz, 1H), 7.26 (dd, *J* = 6.7, 4.0 Hz,

**Fig.S19** <sup>13</sup>C NMR Spectrum of (Z)-N,1-di-*m*-tolylmethanimine oxide in CDCl<sub>3</sub>.

1H). <sup>13</sup>C NMR (101 MHz, CDCl<sub>3</sub>) 149.82, 135.80, 131.91, 131.48, 130.83, 130.04, 129.52, 122.62, 78.40, 78.08, 77.76.

(Z)-1-phenyl-*N*-(*p*-tolyl)methanimine oxide. Brown solid, mp:104-110 °C. <sup>1</sup>H NMR (400 MHz, CDCl<sub>3</sub>) δ 8.42 (dd, *J* = 6.7, 2.6 Hz, 1H), 7.93 (s, 1H), 7.69 (d, *J* = 8.3 Hz, 1H), 7.50 (dd, *J* = 5.2, 1.6

Hz, 2H), 7.39 – 7.25 (m, 1H), 2.44 (s, 1H). <sup>13</sup>C NMR (101 MHz, CDCl<sub>3</sub>) 147.67, 141.07, 135.08, 131.70, 131.62, 130.52, 129.89, 129.50, 122.36, 78.24, 77.93, 77.61, 22.04.

(Z)-1-(*p*-chlorophenyl)-*N*-phenylmethanimine oxide. yellow solid, mp: 154-157 °C. <sup>1</sup>H NMR (400 MHz, CDCl<sub>3</sub>) δ 8.39 (d, *J* = 8.6 Hz, 1H), 7.95 (s, 1H), 7.85 – 7.72 (m, 1H), 7.58 – 7.43 (m, 3H). <sup>13</sup>C NMR (101 MHz, CDCl<sub>3</sub>) 148.88, 136.44, 133.61, 130.26, 130.18, 129.27, 129.14, 128.97, 121.72, 77.42, 77.10, 76.78.

(Z)-*N*-*m*-tolyl-1-(*p*-tolyl)methanimine oxide. Yellow oil. <sup>1</sup>H NMR (400 MHz, CDCl<sub>3</sub>) δ 8.31 (d, *J* = 8.6 Hz, 1H), 7.85 (s, 1H), 7.57 (s, 1H), 7.51 (d, *J* = 8.0 Hz, 1H), 7.36 – 7.16 (m, 2H), 2.48 (s, 2H), 2.39 (s, 2H). <sup>13</sup>C NMR (101 MHz, CDCl<sub>3</sub>) 149.70, 143.57, 140.20, 135.02, 131.39, 130.21, 129.72, 128.02, 126.11, 123.14, 119.47, 78.46, 78.14, 77.82, 22.22, 15.73.

(Z)-1-(*p*-chlorophenyl)-*N*-(*m*-tolyl)methanimine oxide. Brown solid, mp: 77-82 °C. <sup>1</sup>H NMR (400 MHz, CDCl<sub>3</sub>) δ 8.35 (d, *J* = 8.6 Hz, 2H), 7.89 (s, 1H), 7.57 (s, 1H), 7.51 (d, *J* = 8.4 Hz, 1H), 7.41 (d, *J* = 8.7 Hz, 2H), 7.33 (t, *J* = 7.8 Hz, 1H), 7.26 (d, *J* = 7.6 Hz, 1H), 2.41 (s, 3H). <sup>13</sup>C NMR (101 MHz, CDCl<sub>3</sub>) 149.71, 140.34, 137.08, 134.28, 131.69, 131.07, 130.06, 129.81, 129.71, 123.18, 119.51, 78.37, 78.05, 77.73, 22.22.

(Z)-1-phenyl-*N*-(*m*-tolyl)methanimine oxide. Brown oil. <sup>1</sup>H NMR (400 MHz, CDCl<sub>3</sub>) δ 8.39 (dd, *J* = 6.6, 3.2 Hz, 2H), 7.90 (s, 1H), 7.60 (s, 1H), 7.54 (d, *J* = 7.9 Hz, 1H), 7.47 (dd, *J* = 5.1, 1.8 Hz, 3H), 7.35 (t, *J* = 7.8 Hz, 1H), 7.26 (t, *J* = 3.8 Hz, 1H), 2.43 (s, 3H). <sup>13</sup>C NMR (101 MHz, CDCl<sub>3</sub>) 149.92, 140.33, 135.72, 131.84, 131.57, 131.52, 129.99, 129.80, 129.52, 123.33, 119.66, 78.24, 77.92, 77.61, 22.24.

(Z)-1-(*p*-(methylthio)phenyl)-*N*-phenylmethanimine oxide. Yellow crystal, mp: 147-153 °C. <sup>1</sup>H NMR (400 MHz, CDCl<sub>3</sub>) δ 8.35 (d, *J* = 8.5 Hz, 2H), 7.90 (s, 1H), 7.79 (dd, *J* = 8.0, 1.8 Hz, 2H), 7.49 (dd, *J* = 7.2, 0.7 Hz, 3H), 7.34 – 7.31 (m, 2H), 2.55 (s, 3H). <sup>13</sup>C NMR (101 MHz, CDCl<sub>3</sub>) 149.81, 143.65, 134.98, 130.68, 130.17, 130.01, 128.03, 126.23, 122.52, 78.24, 77.92, 77.61, 15.81.

(Z)-*N*,1-di-*m*-tolylmethanimine oxide. Brown oil. <sup>1</sup>H NMR (400 MHz, CDCl<sub>3</sub>) δ 8.33 (s, 1H), 8.15 (d, *J* = 7.8 Hz, 1H), 7.89 (s, 1H), 7.62 (s, 1H), 7.56 (d, *J* = 7.9 Hz, 1H), 7.37 (dt, *J* = 10.0, 7.8 Hz, 2H), 7.29 (dd, *J* = 11.4, 7.4 Hz, 2H), 2.44 (d, *J* = 3.4 Hz, 6H). <sup>13</sup>C NMR (101 MHz, CDCl<sub>3</sub>) 149.96, 140.27, 139.17, 135.80, 132.72, 131.48, 130.36, 129.77, 129.37, 127.37, 123.28, 119.61, 22.35, 22.25.

**7. Table S1** CHNS analysis of nitron compounds

| Entry | Nitron                                                                              | %C    | %N   | %H   | %S |
|-------|-------------------------------------------------------------------------------------|-------|------|------|----|
| 1     | 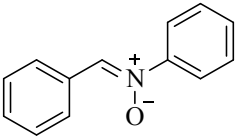 | 78.23 | 7.09 | 5.99 | -  |

|   |                                                                                     |       |       |      |       |
|---|-------------------------------------------------------------------------------------|-------|-------|------|-------|
| 2 | 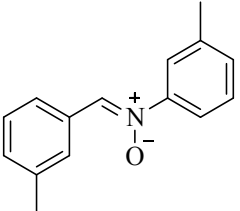   | 78.51 | 6.12  | 6.82 | -     |
| 3 |    | 67.35 | 5.59  | 5.06 | -     |
| 4 |    | 78.86 | 6.23  | 6.24 | -     |
| 5 |    | 66.44 | 5.97  | 4.82 | -     |
| 6 |   | 78.72 | 6.545 | 6.22 | -     |
| 7 |  | 68.14 | 5.44  | 5.63 | 12.34 |
| 8 |  | 79.2  | 6.46  | 6.84 | -     |

**8. Table S2** CHNS analysis of the CdS catalysts.

| catalyst | C% | N% | H% | S% | Organic compound% |
|----------|----|----|----|----|-------------------|
|----------|----|----|----|----|-------------------|

---

|                                           |       |      |       |       |       |
|-------------------------------------------|-------|------|-------|-------|-------|
| CdS                                       | 2.1   | 1.42 | 0.51  | 22.18 | 4.03  |
| Reused<br>CdS                             | 17.30 | 2.51 | 1.42  | 14.82 | 21.23 |
| seperated<br>CdS-PEG                      | 3.84  | 0.63 | 0.173 | 20    | 4.64  |
| Separated<br>CdS-PEG<br>after<br>reaction | 2.08  | 0.68 | 0.1   | 20.57 | 2.86  |

---
